# Supplementary material
Source: ML conference proceedings conference paper supplement (https://www.ecva.net/papers/eccv_2020/papers_ECCV/html/123470052_ECCV_2020_paper.php)
Supplement: Supplementary file 1 [file 123470052-supp.pdf]

## A Interesting Scenes in SubT

Fig. 7 shows the detected interesting scenes from SubT dataset. It can be seen that many interesting scenes, e.g., doors and intersections, are detected.

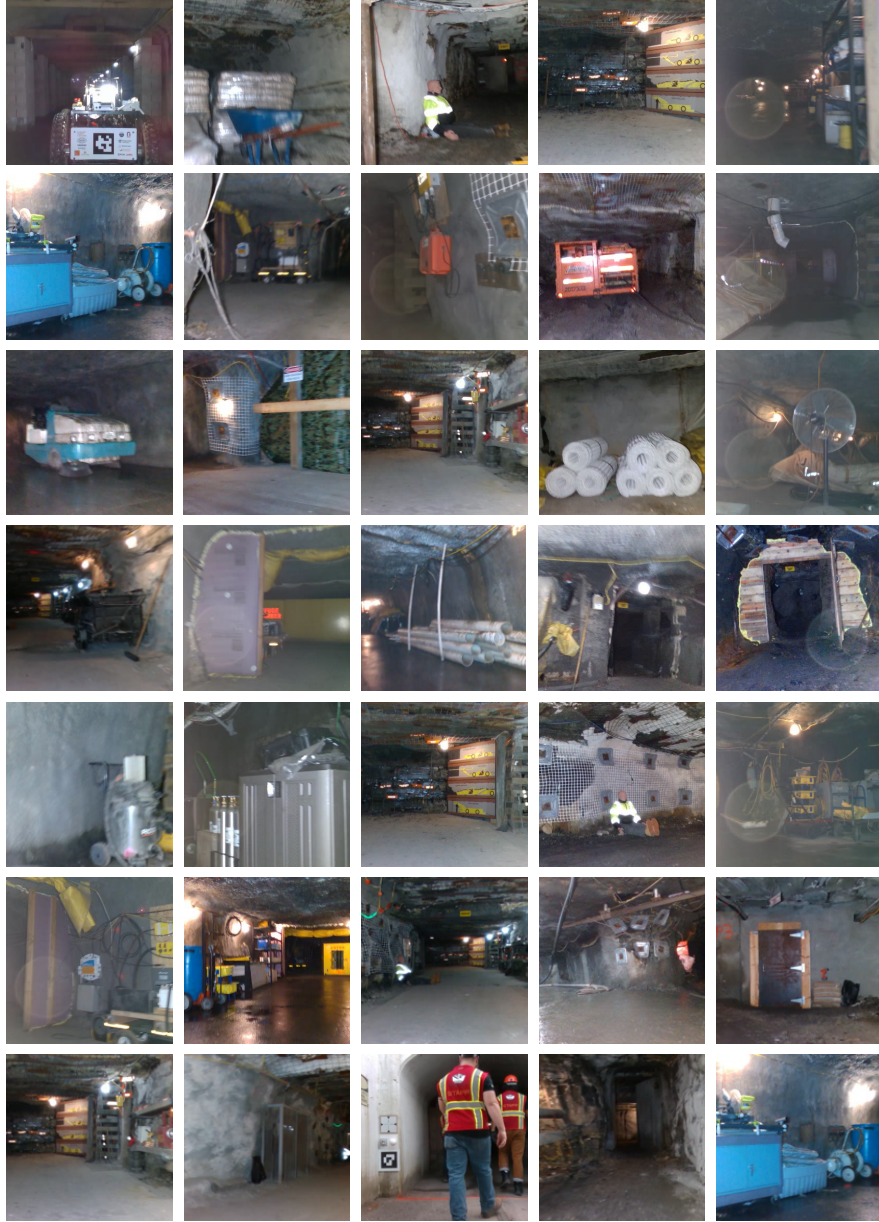

Fig. 7: The examples of the detected interesting scenes.
